# Supplementary material for: Diagnostic Performance of Deep Learning-Based Lesion Detection Algorithm in CT for Detecting Hepatic Metastasis from Colorectal Cancer
Source: PubMed Central journal article supplement — Korean J Radiol. 2021 Feb 25;22(6):912–21. doi: 10.3348/kjr.2020.0447 (PMC8154788; doi:10.3348/kjr.2020.0447), 2021-02-25
Supplement: kjr-22-912-s006.pdf [file kjr-22-912-s006.pdf]

## SUPPLEMENTARY MATERIALS 6

### Effect of Threshold Modification on Diagnostic Performance

Table 3 illustrates the result of per-lesion binary classification based on the following thresholds: 1) The class with the highest DLLD confidence score was considered to be the decision for the lesion; 2) lesions with a reader confidence score  $\geq 3$  were considered metastasis. In binary classification, threshold modification causes a change in the performance of the DLLD and reader.

Supplementary Table 3 demonstrates the results based on the following thresholds: 1) lesions with a DLLD metastasis confidence score  $\geq 80$  were considered metastasis; 2) lesions with a reader confidence score  $\geq 4$  were considered metastasis. The sensitivity of DLLD was not significantly different from that of the abdominal radiologists and radiology residents (69.70%, CI [60.64, 78.75]; 68.01%, CI [62.68, 73.35],  $p = 0.750$ ; 64.31%, CI [58.83, 69.79],  $p = 0.332$ , respectively). The FPP of DLLD was higher than that of the abdominal radiologists and radiology residents (0.541, CI [0.433, 0.649]; 0.126, CI [0.085, 0.166],  $p < 0.001$ ; 0.247, CI [0.194, 0.300],  $p < 0.001$ , respectively).

Supplementary Table 4 illustrates the results based on the following thresholds: 1) lesions with a DLLD metastasis confidence score of 100 were considered metastasis; 2) lesions with a reader confidence score of 5 were considered metastasis. The sensitivity of DLLD was not significantly different from that of the abdominal radiologists and radiology residents (37.37%, CI [27.84, 46.90]; 47.81%, CI [42.10, 53.53],  $p = 0.068$ ; 37.04%, CI [31.51, 42.56],  $p = 0.951$ , respectively). The FPP of DLLD was not significantly different as compared to that of the abdominal radiologists and radiology residents (0.094, CI [0.032, 0.156]; 0.039, CI [0.015, 0.063],  $p = 0.109$ ; 0.063, CI [0.033, 0.093],  $p = 0.384$ , respectively).
