# Supplementary material for: Diagnostic Performance of Deep Learning-Based Lesion Detection Algorithm in CT for Detecting Hepatic Metastasis from Colorectal Cancer
Source: PubMed Central journal article supplement — Korean J Radiol. 2021 Feb 25;22(6):912–21. doi: 10.3348/kjr.2020.0447 (PMC8154788; doi:10.3348/kjr.2020.0447), 2021-02-25
Supplement: kjr-22-912-s007.pdf [file kjr-22-912-s007.pdf]

## SUPPLEMENTARY MATERIALS 7

### Diagnostic Performance of DLLD in the Detection and Classification of Cyst and Hemangioma

Lesion-based diagnostic performance of DLLD in the detection and classification of cyst, hemangioma, and colorectal liver metastasis in the validation cohort are listed in Supplementary Table 5. DLLD showed similar sensitivities for detecting cysts (81.2%, 186/229) and metastasis (81.8%, 81/99); however, fewer FPP of the cyst (0.602, 50/83) than that of metastasis (1.361, 113/83).

The sensitivity for detecting hemangioma was very low (23.8%, 5/21) and the FPP with hemangioma were also relatively low (0.193, 16/83). We assume that the reason for the low sensitivity towards hemangioma is that, firstly, the number of hemangiomas used in the training phase is very small (153 hemangiomas, 441 images) compared to that of cysts (990 cysts, 1739 images) and metastases (612 metastases and 2206 images). Second, many hemangiomas included in the validation cohort did not show a characteristic nodular or globular peripheral enhancement pattern on portal venous phase CT images; therefore, it was quite difficult for DLLD and radiologists to diagnose hemangioma accurately without dynamic contrast-enhanced CT images.

For improving the focal lesion characterization performance of DLLD, artificial intelligence technology must be applied to the dynamic contrast images used in the actual reading environment with a sufficient number of images per class.

## REFERENCES

1. Ito K, Mitchell DG, Outwater EK, Szklaruk J, Sadek AG. Hepatic lesions: discrimination of nonsolid, benign lesions from solid, malignant lesions with heavily T2-weighted fast spin-echo MR imaging. *Radiology* 1997;204:729-737
2. Horton KM, Bluemke DA, Hruban RH, Soyer P, Fishman EK. CT and MR imaging of benign hepatic and biliary tumors. *Radiographics* 1999;19:431-451
3. Redmon J, Divvala S, Girshick R, Farhadi A. You only look once: unified, real-time object detection. Proceedings 2016 IEEE Conference on Computer Vision and Pattern Recognition (CVPR); 2016 Jun 27-30; Las Vegas, NV, USA: IEEE; p. 779-788
4. Redmon J, Farhadi A. YOLO9000: better, faster, stronger. Proceedings 2017 IEEE Conference on Computer Vision and Pattern Recognition (CVPR); 2017 Jul 21-26; Honolulu, HI, USA: IEEE; p. 7263-7271
5. Redmon J, Farhadi A. Yolov3: an incremental improvement. *arXiv preprint* 2018;arXiv:1804.02767
6. Benjdira B, Khurshed T, Koubaa A, Ammar A, Ouni K. Car detection using unmanned aerial vehicles: comparison between faster R-CNN and YOLOv3. Proceedings UVS-Oman 2019: 1st International Conference on Unmanned Vehicle Systems, Oman; 2019 Feb 5-7; Muscat, Oman: IEEE; p. 1-6
7. Wang H, Yu Y, Cai Y, Chen X, Chen L, Liu Q. A comparative study of state-of-the-art deep learning algorithms for vehicle detection. *IEEE Intell Transp Syst Mag* 2019;11:82-95
8. Wong SC, Gatt A, Stamatescu V, McDonnell MD. Understanding data augmentation for classification: when to warp? Proceedings 2016 International Conference on Digital Image Computing: Techniques and Applications (DICTA); 2016 Nov 30-Dec 2; Gold Coast, Australia: DICTA; p. 1-6
9. Buda M, Maki A, Mazurowski MA. A systematic study of the class imbalance problem in convolutional neural networks. *Neural Netw* 2018;106:249-259
10. Ahn Y, Yoon JS, Lee SS, Suk HI, Son JH, Sung YS, et al. Deep learning algorithm for automated segmentation and volume measurement of the liver and spleen using portal venous phase computed tomography images. *Korean J Radiol* 2020;21:987-997
11. Cho J, Lee K, Shin E, Choy G, Do S. How much data is needed to train a medical image deep learning system to achieve necessary high accuracy? *arXiv preprint* 2015;arXiv:1511.06348
12. Brem RF, Baum J, Lechner M, Kaplan S, Souders S, Naul LG, et al. Improvement in sensitivity of screening mammography with computer-aided detection: a multiinstitutional trial. *AJR Am J Roentgenol* 2003;181:687-693
13. Choi BY, Nguyen MH. The diagnosis and management of benign hepatic tumors. *J Clin Gastroenterol* 2005;39:401-412
14. Hussain SM, Zondervan PE, IJzermans JN, Schalm SW, de Man RA, Krestin GP. Benign versus malignant hepatic nodules: MR imaging findings with pathologic correlation. *Radiographics* 2002;22:1023-1036; discussion 1037-1039
