# Supplementary material for: Diagnostic Performance of Deep Learning-Based Lesion Detection Algorithm in CT for Detecting Hepatic Metastasis from Colorectal Cancer
Source: PubMed Central journal article supplement — Korean J Radiol. 2021 Feb 25;22(6):912–21. doi: 10.3348/kjr.2020.0447 (PMC8154788; doi:10.3348/kjr.2020.0447), 2021-02-25
Supplement: kjr-22-912-s010.pdf [file kjr-22-912-s010.pdf]

**Supplementary Table 1. Comparison of the Lesion-Based Diagnostic Performances of Two DLLDs in the Detection of Colorectal Liver Metastasis**

|                 | 3-Class DLLD (95% CI)         | 1-Class DLLD (95% CI)         | <i>P</i> |
|-----------------|-------------------------------|-------------------------------|----------|
| AUAFROC         | 0.631 (0.520, 0.737)          | 0.432 (0.346, 0.524)          | < 0.001* |
| Sensitivity (%) | 81.82 [81/99] (72.68, 88.39)  | 85.86 [85/99] (78.48, 91.00)  | 0.40     |
| FPP             | 1.330 [113/85] (1.052, 1.681) | 3.365 [286/85] (2.748, 4.120) | < 0.001* |

\*Statistically significant. AUAFROC = area under the alternative free-response receiver operating characteristic curve, CI = confidence interval, DLLD = deep learning-based lesion detection algorithm, FPP = false positives per patient
