# Supplementary material for: Diagnostic Performance of Deep Learning-Based Lesion Detection Algorithm in CT for Detecting Hepatic Metastasis from Colorectal Cancer
Source: PubMed Central journal article supplement — Korean J Radiol. 2021 Feb 25;22(6):912–21. doi: 10.3348/kjr.2020.0447 (PMC8154788; doi:10.3348/kjr.2020.0447), 2021-02-25
Supplement: kjr-22-912-s011.pdf [file kjr-22-912-s011.pdf]

**Supplementary Table 2. Baseline Demographics and Clinical Characteristics of the Training Cohort**

| Variables                             | Value                           |
|---------------------------------------|---------------------------------|
| Mean age (year) ( $\pm$ SD)           | 60.9 ( $\pm$ 11.4), range 22–85 |
| Sex, n (%)                            |                                 |
| Male                                  | 286 (57.0)                      |
| Female                                | 216 (43.0)                      |
| CRC location                          |                                 |
| Colon                                 | 319 (63.5)                      |
| Rectum                                | 183 (36.5)                      |
| CEA (ng/dL), median (IQR)             | 3.2 (0.1–841.0)                 |
| T stage (tumor invasion depth), n (%) |                                 |
| T1–2 (confined to the bowel wall)     | 85 (16.9)                       |
| T3–4 (beyond the bowel wall)          | 417 (83.1)                      |
| N stage (nodal involvement), n (%)    |                                 |
| N- (node negative)                    | 242 (48.2)                      |
| N+ (node positive)                    | 260 (51.8)                      |
| M stage, n (%)                        |                                 |
| M0                                    | 349 (69.5)                      |
| M1                                    | 153 (30.5)                      |
| Liver only                            | 87 (56.9)                       |
| Lung only                             | 2 (1.3)                         |
| Liver plus extrahepatic               | 64 (41.8)                       |

Values represent the number of subjects (%), median (IQR) or mean ( $\pm$  SD). CEA = serum carcinoembryonic antigen, CRC = colorectal cancer, IQR = interquartile range, SD = standard deviation
