# Supplementary material for: Diagnostic Performance of Deep Learning-Based Lesion Detection Algorithm in CT for Detecting Hepatic Metastasis from Colorectal Cancer
Source: PubMed Central journal article supplement — Korean J Radiol. 2021 Feb 25;22(6):912–21. doi: 10.3348/kjr.2020.0447 (PMC8154788; doi:10.3348/kjr.2020.0447), 2021-02-25
Supplement: kjr-22-912-s012.pdf [file kjr-22-912-s012.pdf]

**Supplementary Table 3. Lesion-Based Diagnostic Performance of DLLD and Readers in the Binary Classification (Table 3) \***

| Testee          | Sensitivity (%) (95% CI)     | DLLD vs. Reader ( <i>P</i> ) | FPP (95% CI)                 | DLLD vs. Reader ( <i>P</i> ) |
|-----------------|------------------------------|------------------------------|------------------------------|------------------------------|
| DLLD            | 69.70 [69/99] (60.64, 78.75) |                              | 0.541 [46/85] (0.433, 0.649) |                              |
| Radiologist     |                              | 0.750                        |                              | < 0.001 <sup>†</sup>         |
| Reader-averaged | 68.01 (62.68, 73.35)         |                              | 0.126 (0.085, 0.166)         |                              |
| Reader 1        | 68.69 [68/99]                |                              | 0.071 [6/85]                 |                              |
| Reader 2        | 61.62 [61/99]                |                              | 0.047 [4/85]                 |                              |
| Reader 3        | 73.74 [73/99]                |                              | 0.259 [22/85]                |                              |
| Resident        |                              | 0.332                        |                              | < 0.001 <sup>†</sup>         |
| Reader-averaged | 64.31 (58.83, 69.79)         |                              | 0.247 (0.194, 0.300)         |                              |
| Reader 4        | 73.74 [73/99]                |                              | 0.471 [40/85]                |                              |
| Reader 5        | 70.71 [70/99]                |                              | 0.224 [19/85]                |                              |
| Reader 6        | 48.48 [48/99]                |                              | 0.047 [4/85]                 |                              |

\*Performance comparison when the internal confidence percent of the algorithm was 80% and 4 points of the readers were used as the threshold for positive judgment, <sup>†</sup>Statistically significant, CI = confidence interval, DLLD = deep learning-based lesion detection algorithm, FPP = false positives per patient
