# Supplementary material for: Diagnostic Performance of Deep Learning-Based Lesion Detection Algorithm in CT for Detecting Hepatic Metastasis from Colorectal Cancer
Source: PubMed Central journal article supplement — Korean J Radiol. 2021 Feb 25;22(6):912–21. doi: 10.3348/kjr.2020.0447 (PMC8154788; doi:10.3348/kjr.2020.0447), 2021-02-25
Supplement: kjr-22-912-s014.pdf [file kjr-22-912-s014.pdf]

**Supplementary Table 5. Lesion-Based Diagnostic Performance of DLLD in the Detection and Classification of Cyst, Hemangioma, and Colorectal Liver Metastasis in the Validation Cohort**

| Nodule Type             | Total Number | TP  | FN | FP  | Sensitivity     | FPP            |
|-------------------------|--------------|-----|----|-----|-----------------|----------------|
| Cyst                    | 229          | 186 | 43 | 50  | 81.22 (186/229) | 0.588 (50/85)  |
| Hemangioma              | 21           | 5   | 16 | 16  | 23.81 (5/21)    | 0.188 (16/85)  |
| Metastasis              | 99           | 81  | 18 | 113 | 81.82 (81/99)   | 1.330 (113/85) |
| All three focal lesions | 349          | 272 | 77 | 179 | 77.94 (272/349) | 2.106 (179/85) |

DLLD = deep learning-based lesion detection algorithm, FN = false negative, FP = false positive, FPP = false positives per patient, TP = true positive
