# Supplementary figures and images for: Diagnostic Performance of Deep Learning-Based Lesion Detection Algorithm in CT for Detecting Hepatic Metastasis from Colorectal Cancer
Source: PubMed Central journal article supplement — Korean J Radiol. 2021 Feb 25;22(6):912–21. doi: 10.3348/kjr.2020.0447 (PMC8154788; doi:10.3348/kjr.2020.0447), 2021-02-25

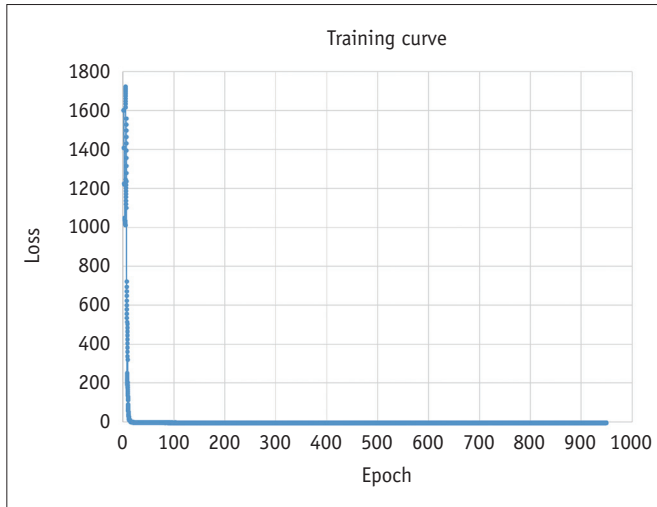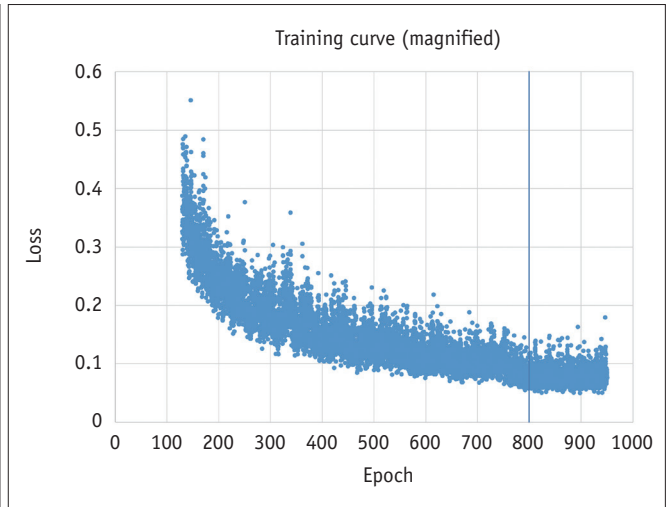

**Supplementary Fig. 1. Training loss curve of YOLOv3.**

Supplement: kjr-22-912-s008.pdf [file kjr-22-912-s008.pdf]

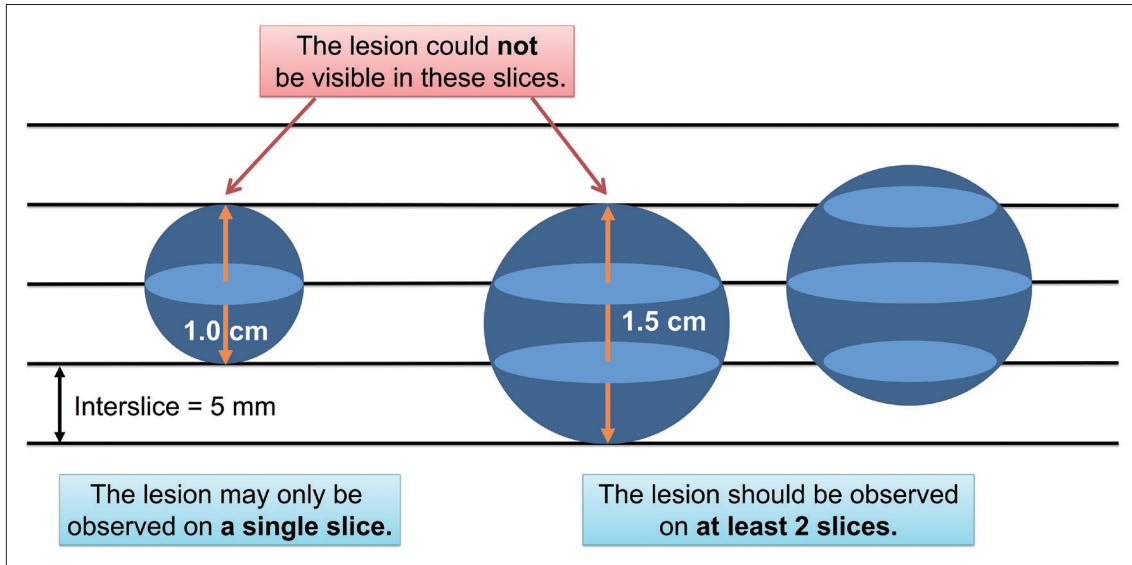

Supplementary Fig. 2. Theoretical background of the false positive filtering method.

Supplement: kjr-22-912-s009.pdf [file kjr-22-912-s009.pdf]
